# Supplementary material
Source: MDPI journal article supplement (https://www.mdpi.com/2624-8549/5/2/75)
Supplement: s1 [file s1]

**Table S1.** Compositions of different pure catalysts.

| Catalyst | Metal content (wt%) |      |      |      |       |
|----------|---------------------|------|------|------|-------|
|          | Mn                  | Na   | W    | La   | Mg    |
| La/MgO   | --                  | --   | --   | 3.02 | 40.80 |
| MnNaWSi  | 1.28                | 0.62 | 2.09 | --   | --    |

**Table S2.** Expected catalytic performance of stacked 10 wt% catalyst based on performance of single components and their mass composition.

|                                                                                | La <sub>2</sub> O <sub>3</sub> | MgO  | MnNaWSi | La/MgO-MnNaWSi_0.1s |
|--------------------------------------------------------------------------------|--------------------------------|------|---------|---------------------|
| Composition of stacked catalyst [mg]                                           | 0.18                           | 4.82 | 45      | -                   |
| Measured CH <sub>4</sub> conversion [%]                                        | 22.5                           | 14   | 6       | <b>21</b>           |
| Measured C <sub>2</sub> selectivity [%]                                        | 37                             | 14.6 | 48      | <b>50</b>           |
| Predicted CH <sub>4</sub> conversion based on stacked catalyst [%] composition |                                |      |         | <b>6.8</b>          |
| Predicted C <sub>2</sub> selectivity based on stacked catalyst [%] composition |                                |      |         | <b>45</b>           |

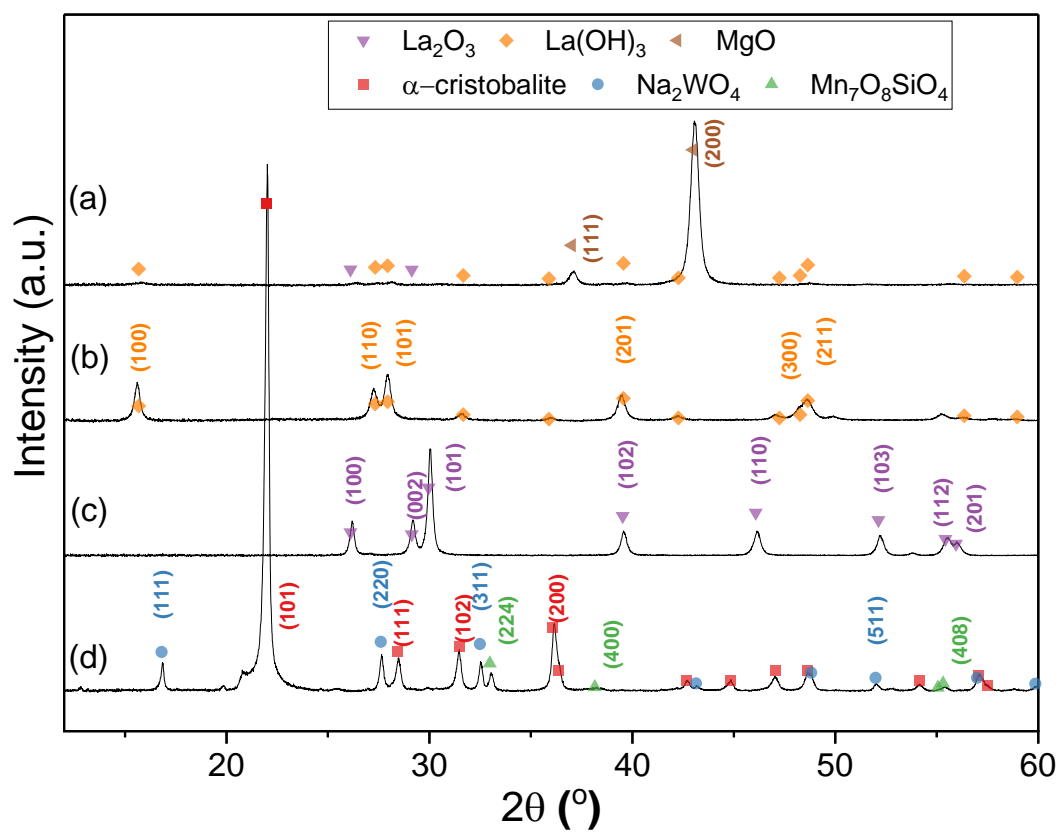

**Figure S1.** XRD patterns for the original catalysts, (a) La/MgO; (b)  $\text{La}_2\text{O}_3$  (after exposure to ambient air); (c)  $\text{La}_2\text{O}_3$  (fresh); (d) MnNaWSi.

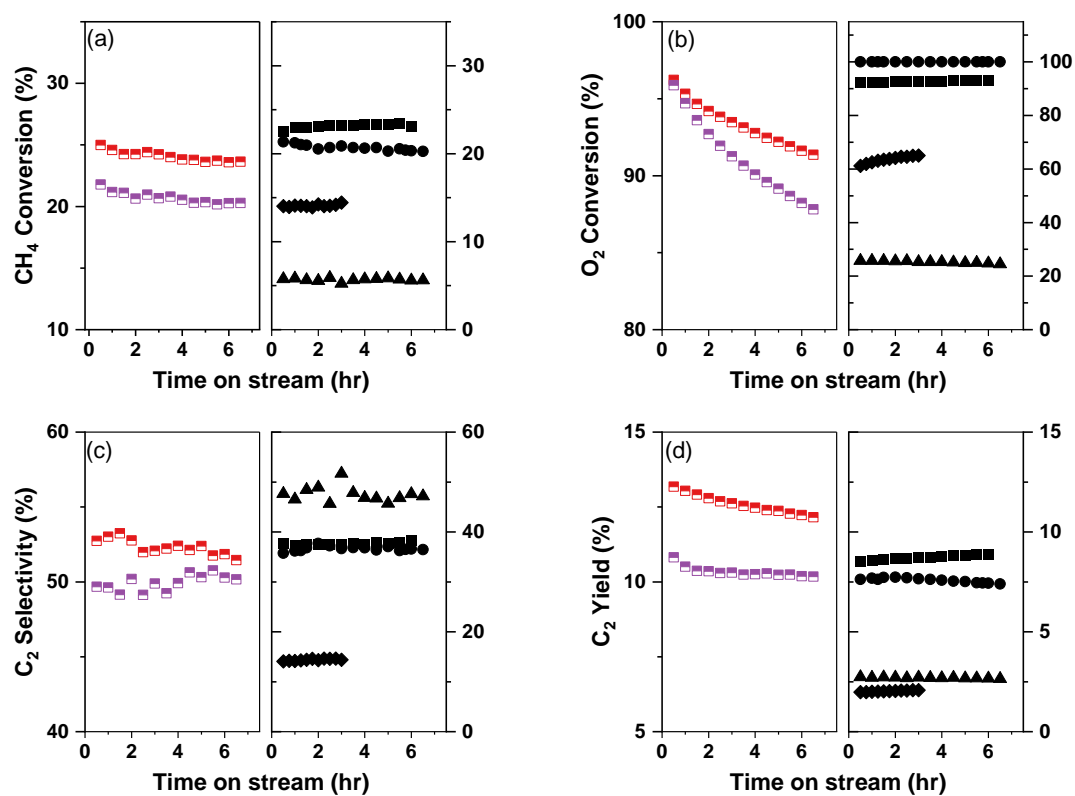

**Figure S2.** Catalytic performance of La<sub>2</sub>O<sub>3</sub> or La/MgO bed stacking over MnNaWSi bed at 725°C.

■ La<sub>2</sub>O<sub>3</sub>-MnNaWSi\_0.1s ■ La/MgO-MnNaWSi\_0.1s ● La/MgO ■ La<sub>2</sub>O<sub>3</sub> ▲ MnNaWSi ◆ MgO

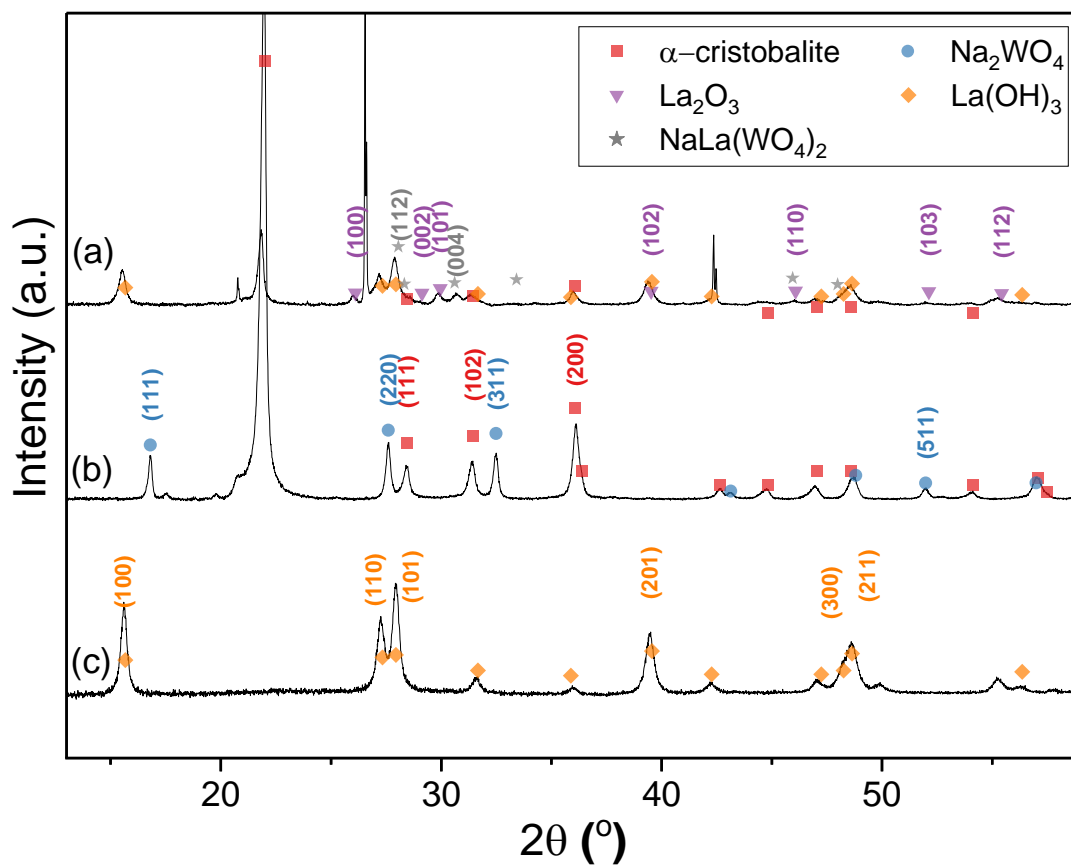

**Figure S3.** XRD patterns: (a) Spent  $\text{La}_2\text{O}_3\text{-NaWSi}_{0.8\text{m}}$  bed reacted for 14 hours at 675 - 725 °C; (b) Fresh NaWSi catalyst; (c) Fresh  $\text{La}_2\text{O}_3$  catalyst.

\* The sharp peaks at 20.76°, 26.53° and 42.36° are assigned to the inert quartz sand in the mixture.

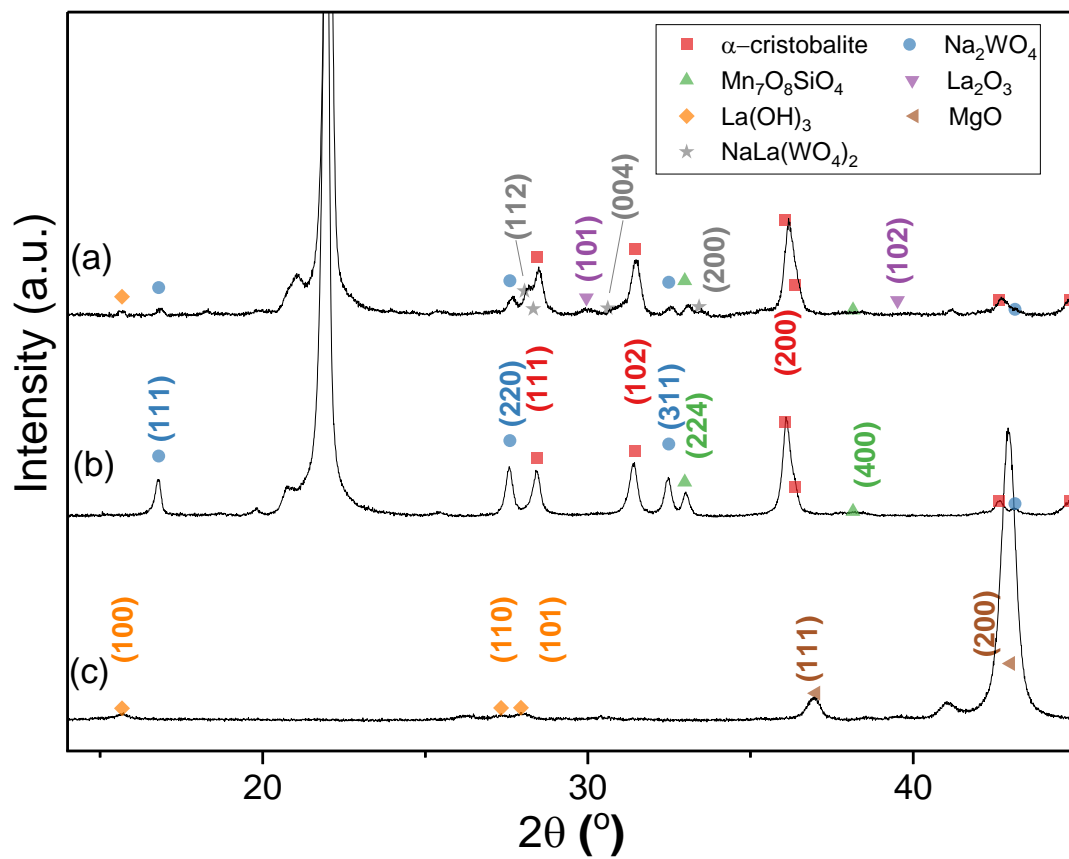

**Figure S4.** XRD patterns: (a) Spent La/MgO-MnNaWSi<sub>0.1m</sub> bed, reacted for 14 hours at 725-750 °C; (b) Fresh MnNaWSi catalyst; (c) Fresh La/MgO catalyst.

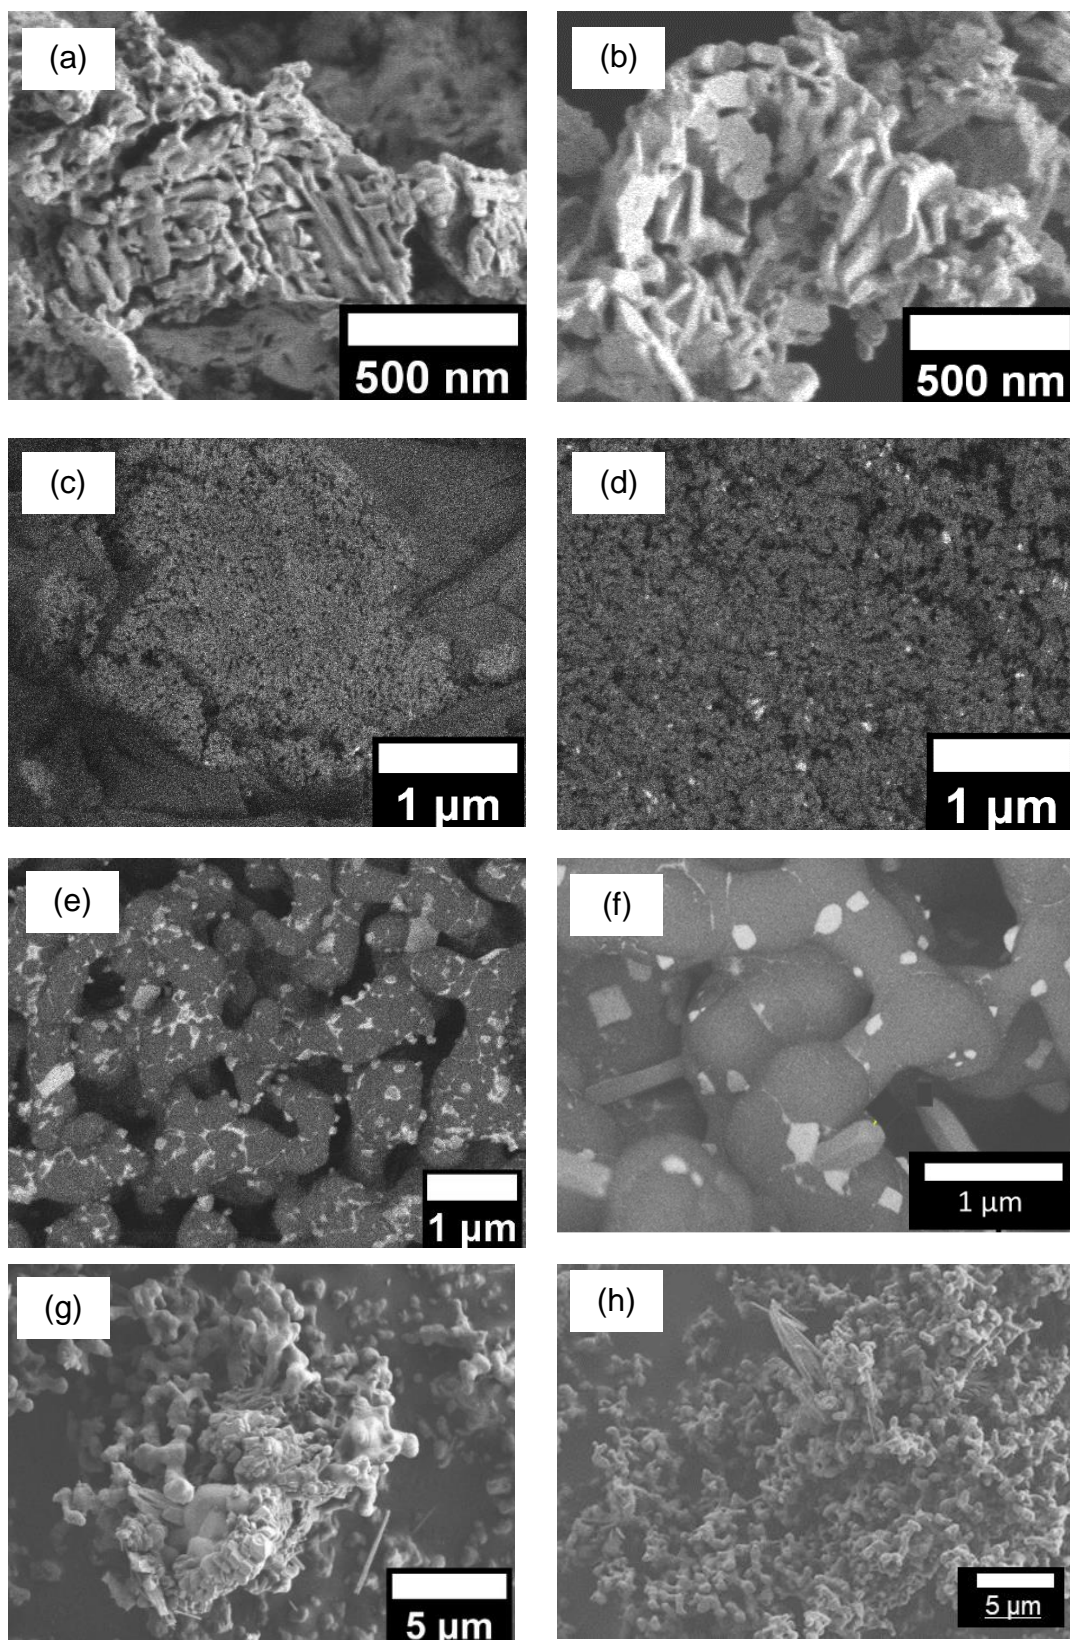

**Figure S5.** HR-SEM images of fresh and spent catalysts: (a) fresh bulk  $\text{La}_2\text{O}_3$ ; (b) Spent  $\text{La}_2\text{O}_3$ ; (c) fresh  $\text{La/MgO}$ ; (d) Spent  $\text{La/MgO}$ ; (e) fresh  $\text{MnNaWSi}$ ; (f) spent  $\text{MnNaWSi}$ ; (g) spent  $\text{La/MgO-MnNaWSi}_{0.1s}$ ; (h) spent  $\text{La/MgO-MnNaWSi}_{0.1m}$ . The images for the spent catalysts were taken after 14-20 h of reaction at 725-750 °C.

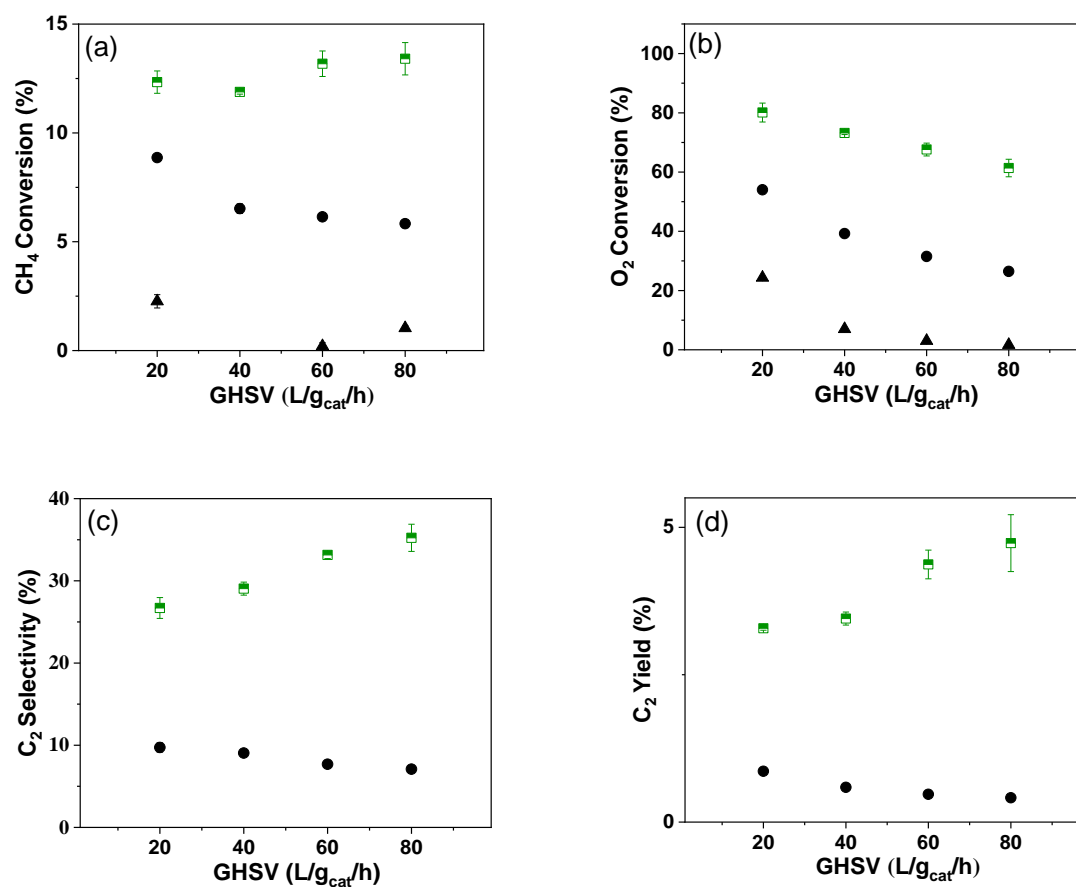

**Figure S6.** Catalytic performance over a range of GHSV (20-80 L g<sup>-1</sup> h<sup>-1</sup>) at T = 675 °C; 50 mg catalyst; Catalyst bed 5 mm; molar ratio of CH<sub>4</sub>:O<sub>2</sub>:N<sub>2</sub>:Ar = 4:1:1:4 and ~1.3 bar. To retain the same bed size we replaced part of the domains with quartz particles.

(La/MgO-MnNaWSi<sub>0.1</sub>s, La/MgO and 7MnNaWSi

\* Note, the 7MnNaWSi did not show measurable C<sub>2</sub> selectivity and yield under the current reaction condition.
